# Supplementary material
Source: HighWire-hosted journal article supplement (https://www.ez-admanager.com/content/suppl/2018/06/28/WNL.0000000000004541)
Supplement: escudero_1471.pdf [file escudero_1471.pdf]

# Síndromes del SNC asociados a anticuerpos sin signos de inflamación en el adulto mayor

Domingo Escudero,  
MD, PhD\*  
Mar Guasp, MD\*  
Helena Ariño, MD, PhD  
Carles Gaig, MD, PhD  
Eugenia Martínez-  
Hernández, MD, PhD  
Josep Dalmau, MD, PhD  
Francesc Graus, MD,  
PhD

Correspondencia y solicitud de  
separatas a Dr. Graus:  
fgraus@clinic.ub.es

## RESUMEN

**Objetivo:** Reportar los síndromes del SNC de pacientes  $\geq$  de 60 años de edad con anticuerpos contra antígenos de superficie neuronal, pero sin evidencia de cambios inflamatorios en la RM encefálica y LCR. **Métodos:** Este fue un análisis clínico retrospectivo de pacientes con anticuerpos contra antígenos de superficie neuronales que cumplieron 3 criterios: edad  $\geq$  60 años, sin anomalías inflamatorias en el cerebro por RM y sin pleocitosis en LCR. Los anticuerpos se determinaron con técnicas reportadas.

**Resultados:** Entre 155 pacientes  $\geq$  60 años de edad con síndromes neurológicos relacionados con anticuerpos contra antígenos de superficie neuronal, 35 (22,6%) cumplieron los criterios indicados. La mediana de edad de estos 35 pacientes fue de 68 años (rango 60-88 años). Las manifestaciones clínicas incluyeron crisis distónicas faciobraquiales (CDFB) en 11 de 35 (31,4%) pacientes, todas con anticuerpos LGI1; una combinación de inestabilidad de la marcha, disfunción del tallo cerebral y trastorno del sueño asociado con anticuerpos IgLON5 en 10 (28,6%); confusión aguda, pérdida de memoria y cambios de comportamiento que sugieren encefalitis autoinmune (EA) en 9 (25,7%; 2 pacientes con AMPAR, 2 con NMDAR, 2 con GABA<sub>B</sub>, 2 con LGI1 y 1 con anticuerpos CASPR2); y deterioro cognitivo rápidamente progresivo en 5 (14,3%; 3 pacientes con anticuerpos IgLON5, 1 con corea; 1 con ataxia cerebelosa y rigidez de brazos asociada a anticuerpos DPPX; y 1 con anticuerpos CASPR2).

**Conclusiones:** En pacientes  $\geq$  60 años de edad, la correcta identificación de los síndromes característicos del SNC (CDFB, síndrome anti-IgLON5, EA) debe alentar a la realización de pruebas de anticuerpos incluso sin evidencia de la inflamación en estudios de RM y LCR. Hasta el 15% de los pacientes desarrollan un deterioro cognitivo rápidamente progresivo, que complicó aún más el diagnóstico diferencial con un desorden neurodegenerativo. *Neurology*® 2017;89:1471-1475

## GLOSARIO

EA = encefalitis autoinmune; CDFB = crisis distónicas faciobraquiales.

La caracterización de anticuerpos contra antígenos de superficie neuronales como biomarcadores de síndromes neurológicos tratables ha cambiado el enfoque diagnóstico de las encefalitis y otros trastornos inflamatorios del SNC.<sup>1</sup> Sin embargo, en pacientes  $\geq$  60 años con estos síndromes, el diagnóstico diferencial puede complicarse por el hecho de que los signos de inflamación en las neuroimágenes o estudios de LCR pueden estar ausentes. Además, algunos síndromes del SNC asociados a anticuerpos –tales como el síndrome descrito recientemente con anticuerpos IgLON5<sup>2</sup>– rara vez muestran anomalías inflamatorias.

Reportamos los síndromes del SNC de pacientes  $\geq$  60 años de edad con anticuerpos contra antígenos de superficie neuronales, pero sin evidencia de cambios inflamatorios en la RM encefálica y el LCR en la evaluación inicial o en estudios seriados cuando estuvieron disponibles.

**MÉTODOS** Identificamos retrospectivamente pacientes  $\geq$  60 años de edad cuyas muestras de suero o LCR se enviaron a nuestro laboratorio para determinación de anticuerpos neuronales. Los estudios incluyeron inmunohistoquímica de cerebro de rata y un ensayo basado en células HEK293 que expresan los receptores LGI1, CASPR2, IgLON5, DPPX, mGluR5, NMDAR, AMPAR, receptor GABA<sub>B</sub> o GABA<sub>A</sub> previamente reportado.<sup>3</sup> Los criterios de exclusión incluyeron síndromes que involucraban predominantemente la médula espinal o el sistema nervioso periférico.

**Estándares de aprobaciones de protocolo, registros y consentimientos de pacientes.** Se obtuvo el consentimiento escrito de los pacientes para el almacenamiento y uso de las muestras con fines de investigación. El estudio fue aprobado por el comité de ética del Hospital Clínic, Barcelona, España.

Datos suplementarios en  
[Neurology.org](http://Neurology.org)

\*Estos autores contribuyeron igualmente a este trabajo.

Del Servicio de Neurología (D.E., M.G., C.G., J.D., F.G.), Hospital Clínic, Universidad de Barcelona; Programa de Neuroinmunología (H.A., C.G., E.M.-H., J.D., F.G.), Institut d'Investigació Biomèdica August Pi i Sunyer; Institució Catalana de Recerca i Estudis Avançats (J.D.), Barcelona, España; y el Departamento de Neurología (J.D.), Universidad de Pensilvania, Filadelfia.

Visite [Neurology.org](http://Neurology.org) para conocer la información completa. La información de financiación y las divulgaciones consideradas relevantes por los autores, si las hay, se proporcionan al final del artículo.

**Figura 1** Distribución de los pacientes de acuerdo con el tipo de anticuerpo

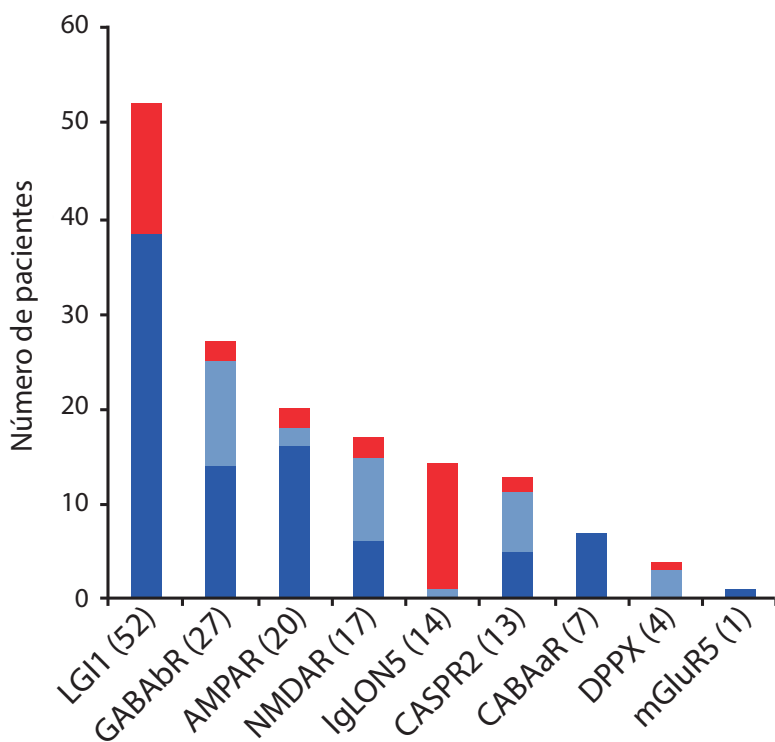

Frecuencia de pacientes  $\geq 60$  años con (azul) o sin (rojo) pleocitosis en LCR o cambios inflamatorios en la RM encefálica. El número de casos por cada anticuerpo se detalla en paréntesis. Azul oscuro en la columna indica número de pacientes con hallazgos en RM encefálica compatible con encefalitis, azul claro indica número de casos con RM normal y LCR con pleocitosis.

**RESULTADOS** De 155 pacientes con edad  $\geq 60$  años y anticuerpos contra antígenos de superficie neuronales, 35 (22,6%) cumplieron los criterios indicados de los síndromes del SNC sin evidencia de inflamación. Entre esos 155 pacientes, el anticuerpo más común era LGI1 (figura 1). Excepto para pacientes con anticuerpos IgLON5 que generalmente no muestran evidencia de inflamación (93%), la frecuencia de pacientes con este perfil varió de 25% (anticuerpos LGI1) a 7% (anticuerpos del receptor GABA $\beta$ ) (figura 1). Comparado a pacientes más jóvenes (edad,  $< 60$  años), la frecuencia de este perfil no inflamatorio fue mayor en pacientes con anticuerpos LGI1 (25% vs 3%,  $p = 0,01$ ) e IgLON5 (93% vs 50%,  $p = 0,03$ ) (figura e-1 en Neurology.org).

Once de 13 pacientes con anticuerpos LGI1 presentaron crisis distónicas faciobraquiales (CDFB), que fue el síntoma más predominante o el único por varias semanas o meses. Todos los pacientes mejoraron con inmunoterapia (tabla 1). Cuando estos 13 pacientes fueron comparados con el grupo de 39 pacientes de rango de edad similar y anticuerpos LGI1, pero con evidencia de cambios inflamatorios en RM o LCR (por ejemplo, encefalitis límbica o pleocitosis), fue más probable que aquellos sin cambios inflamatorios se presentaran solo o predominantemente con CDFB (85% vs 20%,  $p < 0,001$ ) (tabla 2). En

cuanto al resto de los anticuerpos en consideración, no se observaron diferencias significativas entre pacientes con o sin cambios inflamatorios, a excepción de un retraso en el diagnóstico en aquellos sin cambios inflamatorios (mediana 3 vs 1 mes,  $p < 0,005$ ) (tabla e-1).

Trece pacientes tenían anticuerpos IgLON5; de estos, 10 (77%) desarrollaron un curso clínico caracterizado por síntomas bulbares ( $n = 9$ ), inestabilidad de la marcha ( $n = 8$ ) y la disfunción del sueño ( $n = 8$ ), y otros 3 pacientes desarrollaron deterioro cognitivo progresivo (discutido después). La disfunción del sueño se caracterizó por episodios de vocalizaciones y actividad motora con propósito durante el sueño no REM, sueño REM anormal, estridor y apneas. Ninguno de los pacientes con anticuerpos IgLON-5 mostraron sustanciales mejoras con la inmunoterapia, que incluyeron esteroides en 8 pacientes, inmunoglobulinas intravenosas en 7 y rituximab en 4 (tabla 1).

Nueve (25,7%) pacientes presentaron un síndrome clínico sugestivo de encefalitis autoinmune (EA), que incluyó episodios agudos en pocos días o semanas de confusión, pérdida de memoria, cambio de personalidad, delirio y agitación que dio lugar a una consulta inicial psiquiátrica en 2 de ellos. En 3 pacientes (1 con receptor GABA $\beta$ , 1 con CASPR2 y 1 con anticuerpos LGI1), los síntomas de EA fueron precedidos por ataques epilépticos aislados durante 3, 4 y 15 meses, respectivamente (tabla 1). En 2 de los restantes 6 pacientes, el síndrome evolucionó a una típica encefalitis anti-NMDAR, y en 3 (1 con LGI1, 1 con receptor GABA $\beta$  y 1 con anticuerpos AMPAR), el síndrome sugirió una encefalitis límbica a pesar de la RM normal. Otro paciente con anticuerpos AMPAR, delirio y disminución del nivel de conciencia con respuestas plantares extensoras tuvo una recuperación completa después tratamiento con esteroides (tabla 1).

Cinco (14,3%) pacientes (3 con IgLON5, 1 con DPPX y 1 con anticuerpos Caspr2) desarrollaron un deterioro cognitivo progresivo, que incluyó pérdida de memoria o disfunción de otros dominios cognitivos, pero sin convulsiones ni síntomas psiquiátricos. Uno de estos pacientes con anticuerpos IgLON5 positivos también tenía corea y trastorno del sueño característico. El paciente con los anticuerpos DPPX desarrolló demencia, ataxia de la marcha y rigidez precedida por diarrea. El paciente con los anticuerpos CASPR2 tenía un síndrome amnésico puro sin otros síntomas.

**DISCUSIÓN** Este estudio muestra que en pacientes  $\geq 60$  años de edad con una RM cerebral normal y sin pleocitosis en LCR, la presencia de anticuerpos contra antígenos neuronales de

**Tabla 1** Características clínicas y anticuerpos en pacientes  $\geq 60$  años sin evidencia de cambios inflamatorios en RM cerebral o pleocitosis en LCR

| Síndrome de presentación, n pacientes | Anticuerpo, n          | Comorbilidades <sup>a</sup> | Media en la demora diagnóstica (rango), me | Respuesta a inmunoterapia, n (%) | Estatus en la última visita | Comentarios                                                                    |
|---------------------------------------|------------------------|-----------------------------|--------------------------------------------|----------------------------------|-----------------------------|--------------------------------------------------------------------------------|
| <b>CDFB, 11</b>                       | LGI1, 11               | Ninguna                     | 2 (1-18)                                   | 10/10 (100)                      | Fallecido, 2                | 1 paciente falleció en el contexto de una recaída, 1 falleció de shock séptico |
|                                       |                        |                             |                                            |                                  | Vivo, 8                     | Media de escala mRS de los pacientes vivos, 1                                  |
|                                       |                        |                             |                                            |                                  | Perdido, 1                  |                                                                                |
| <b>Anti-IgION5,<sup>b</sup> 10</b>    | IgLON5                 | Ninguno                     | 18 (2-36)                                  | 1 (10)                           | Fallecido, 5                | Media de escala mRS de los pacientes vivos, 3                                  |
|                                       |                        |                             |                                            |                                  | Vivo, 5                     |                                                                                |
| <b>EA,<sup>c</sup> 6</b>              | NMDA, 2                | Ninguno                     |                                            |                                  | Fallecido, 5                | 4 casos paraneoplásicos                                                        |
|                                       | AMPA, 2                | Timoma                      |                                            |                                  |                             | 2 Anti-NMDAR con CPCR y cáncer de células pequeñas pancreático                 |
|                                       | LGI1, 1                | Ninguno                     | 1,5 (0,5-3)                                | 4/5 (80) <sup>d</sup>            | Perdido, 1                  | Anti-AMPA y cáncer vejiga                                                      |
|                                       | GABA <sub>B</sub> R, 1 | Ninguno                     |                                            |                                  |                             | Anti-GABA <sub>B</sub> R y CPCR                                                |
| <b>Deterioro cognitivo, 5</b>         | IgLON5, 3              |                             |                                            | No                               | Escala mRS, 3               |                                                                                |
|                                       | DPPX, 1                | Ninguno                     | 8 (0,5-16)                                 | Sí                               | Escala mRS, 1               |                                                                                |
|                                       | CASPR2, 1              |                             |                                            | Sí                               | Fallecido <sup>e</sup>      |                                                                                |
| <b>Convulsiones, 3</b>                | GABA <sub>B</sub> R, 1 |                             | 3                                          | Sí                               | Fallecido <sup>f</sup>      | Paraneoplásico (CPCR)                                                          |
|                                       | CASPR2, 1              | Ninguno                     | 4                                          | Sí                               | Escala mRS, 2               |                                                                                |
|                                       | LGI1, 1                |                             | 15                                         | Desconocido                      | Perdido                     |                                                                                |

Abreviaturas: CDFB = crisis dísticas faciobraquiales; CPCR = cáncer de pulmón de células pequeñas; EA = encefalitis autoinmune; mRS = Escala de Rankin modificada.

<sup>a</sup> Diagnóstico previo de cáncer o trastornos autoinmunes.

<sup>b</sup> Definido por una combinación de trastorno del sueño con parasomnia REM y no REM, apnea del sueño, disfunción bulbar e inestabilidad de la marcha.<sup>2</sup>

<sup>c</sup> EA definido como se reportó anteriormente: inicio subagudo (progresión rápida < 3 meses) de déficits de memoria (memoria de trabajo o formación de recuerdos nuevos) o estado mental alterado sin un nivel de conciencia necesariamente disminuido y al menos 1 de los siguientes: nuevos hallazgos focales del SNC o convulsiones no explicadas por un trastorno convulsivo previamente conocido.

<sup>d</sup> El paciente (con anti-AMPA) que no respondió tenía anticuerpos anifisina concomitantes.

<sup>e</sup> Fallecido por enfermedad pulmonar obstructiva crónica grave.

<sup>f</sup> Fallecido por progresión del cáncer.

superficie se asocia con trastornos neurológicos bien definidos tales como CDFB,<sup>4</sup> síndrome anti-IgLON5<sup>2</sup> y EA,<sup>1</sup> y es menos frecuentemente asociado con demencia rápidamente progresiva.<sup>5</sup> Un estudio reciente indica que las anomalías en los ganglios basales se pueden detectar en el 42% de los pacientes con CDFB.<sup>6</sup> No vimos estos cambios en la RM en nuestros pacientes con CDFB de manera aislada, pero las RM no fueron revisadas exhaustivamente. Sin embargo, en una serie de 39 pacientes con encefalitis anti-LGI1 en las cuales las RM cerebrales fueron reevaluadas por un neurorradiólogo, se observaron hiperintensidades en ganglios basales en solo 1 paciente.<sup>7</sup>

La identificación de anticuerpos IgLON5 fue crucial para la caracterización clínica inicial de los síntomas centrales de esta enfermedad. Hallazgos neuropatológicos muestran una nueva tauopatía que sugiere una etiología neurodegenerativa primaria,<sup>2</sup> pero la posibilidad de un mecanismo patogénico inmune también es considerado por experimentos que muestran que los anticuerpos causan un decremento irreversible de la densidad de los IgLON5 de la superficie neuronal. Aunque nuestros pacientes eran refractarios a inmunoterapia, algunos reportes de casos sugieren que el tratamiento puede ser efectivo.<sup>8</sup>

Los criterios diagnósticos más frecuentemente utilizados de encefalitis (de cualquier causa) se basan en la demostración de la disminución del nivel de conciencia, hallazgos en neuroimá-

genes que sugieran inflamación y pleocitosis en LCR. Por el contrario, los criterios recientemente propuestos de EA son menos restrictivos y no requieren evidencia de inflamación del SNC.<sup>1</sup> Nuestros hallazgos confirman que estos criterios son apropiados para identificar una posible EA en aquellos pacientes sin evidencia de inflamación en el SNC.

Solo 1 de 4 pacientes con anticuerpos DPPX en la presente serie tenía estudios normales de RM y LCR. En un estudio previo de 20 pacientes<sup>9</sup> cuyos datos no estuvieron disponibles de manera uniforme, 7 (35%) tenían edad  $\geq 60$  años, 7 de 10 tenían LCR normal y 0 de 13 tenían características de encefalitis en RM, lo que sugiere que los pacientes con este trastorno pueden ser propensos a presentarse sin anomalías inflamatorias en el SNC.

Nuestros hallazgos no apoyan la creencia común que en los ancianos la demencia rápidamente progresiva es una frecuente presentación clínica de trastornos mediados por anticuerpos contra antígenos de superficie neuronales.<sup>6</sup> Creemos que esta baja frecuencia de casos en nuestra serie no es debido a un sesgo de selección porque nuestro laboratorio es un centro de referencia para pacientes con sospecha de demencia por priones y la frecuencia de pacientes con anticuerpos contra los antígenos de superficie neuronal en esos pacientes es < 2%.<sup>10</sup> Por otro lado, reconocemos un sesgo de selección de pacientes con an-

**Tabla 2** Características clínicas y paraclínicas de pacientes con anticuerpos LGI1  $\geq 60$  años con y sin evidencia de inflamación en la RM encefálica y pleocitosis en LCR

| Variables                                                   | Sin características de inflamación (n = 13) | Con características de inflamación (n = 39) | Valor p  |
|-------------------------------------------------------------|---------------------------------------------|---------------------------------------------|----------|
| Edad, media (rango), años                                   | 73 (61-88)                                  | 70 (60-81)                                  | NS       |
| Varones, n (%)                                              | 12 (92,3)                                   | 24 (61,5)                                   | 0,04     |
| Demora en el diagnóstico, <sup>a</sup> media (rango), meses | 2 (0,75-18)                                 | 2 (0,5-24)                                  | NS       |
| Período diagnóstico, n (%)                                  |                                             |                                             | NS       |
| 2012-2016                                                   | 11 (84,6)                                   | 23 (59,0)                                   |          |
| Antes 2012                                                  | 2 (15,4)                                    | 16 (41,0)                                   |          |
| CDFB síntoma predominante/aislado, n (%)                    | 11 (84,6)                                   | 8 (20,5)                                    | < 0,0001 |
| Síndrome clínico al diagnóstico, n (%)                      |                                             |                                             | NS       |
| Convulsiones aisladas <sup>b</sup>                          | 5 (38,5)                                    | 4 (10,3)                                    |          |
| Posible encefalitis <sup>c</sup>                            | 5 (38,5)                                    | 25 (64,1)                                   |          |
| Deterioro cognitivo <sup>d</sup>                            | 3 (23,0)                                    | 10 (25,6)                                   |          |
| Hiponatremia, n (%)                                         | 5 (38,5)                                    | 20/32 (62,5)                                | NS       |
| Respuesta a inmunoterapia, n (%)                            | 11/11 (100)                                 | 32/35 (91,4)                                | NS       |
| Estatus en última visita, n                                 |                                             |                                             | NS       |
| Vivo, escala mRS score 0-2                                  | 8                                           | 23                                          |          |
| Vivo, escala mRS score 3-5                                  | 0                                           | 5                                           |          |
| Muerte                                                      | 2                                           | 2                                           |          |

Abreviaturas: CDFB= crisis dísticas faciobraquiales; mRS= escala de Rankin modificada; NS = no significativo ( $p \geq 0,05$ ).

<sup>a</sup> Tiempo en meses entre los primeros síntomas y el diagnóstico de LGI1.

<sup>b</sup> Incluye cualquier tipo de convulsiones.

<sup>c</sup> De acuerdo con los criterios de Graus et al.<sup>1</sup>

<sup>d</sup> Deterioro cognitivo de > 3 meses que puede estar asociado con convulsiones o cambios de comportamiento.

ticuerpos IgLON5 probablemente debido a nuestra descripción original del desorden y del acceso limitado a tests comerciales de diagnóstico.<sup>2</sup>

En general, nuestros hallazgos sugieren que los médicos deben ser conscientes de la ocurrencia de trastornos inmunes del SNC sin signos de inflamación cerebral en estudios de RM y LCR. Algunas manifestaciones clínicas como CDFB, síndrome anti-IgLON5, o síntomas rápidamente progresivos compatibles con EA a menudo sugieren el diagnóstico. A pesar de esto, el diagnóstico es dificultoso por una pequeña proporción de pacientes con deterioro cognitivo predominante. En estos casos, datos adicionales –como síntomas gastrointestinales (diarrea) o trastornos del sueño progresivo inexplicable– pueden sugerir un caso autoinmune, que puede evaluarse con pruebas de autoanticuerpos.

## CONTRIBUCIONES DE LOS AUTORES

Concepto y diseño del estudio: Escudero, Dalmau, Graus. Adquisición de datos: todos los autores. Análisis e interpretación de datos: todos los autores. Redacción del manuscrito: Escudero, Guasp, Dalmau, Graus. Revisión crítica del manuscrito para contenido intelectual importante: todos los autores. Adquisición de financiación: Graus, Dalmau. Supervisión del estudio: Dalmau, Graus.

## FONDOS PARA EL ESTUDIO

Este estudio fue apoyado en parte por el Fondo de Investigaciones Sanitarias, FEDER, España (FIS 15/00377, F.G., FIS 14/00203, J.D.), Instituto de Salud Carlos III CD14 / 00155 (E.M.-H.), Centros de Investigación Biomédica en Red de

enfermedades raras (E.M.-H., J.D.) NIH RO1NS077851 (J.D.) y Fundació Cellex (J.D.).

## REVELACIÓN

D. Escudero, M. Guasp, H. Ariño, C. Gaig y E. Martínez-Hernández no informan ninguna divulgación relevante para el manuscrito. J. Dalmau recibe regalías de Athena Diagnostics por el uso de Ma2 como autoanticuerpo prueba y de Euroimmun para el uso de NMDA, receptor GABAB, receptor GABAA, DPPX e IgLON5 como pruebas de autoanticuerpos; él recibió una subvención de investigación sin restricciones de Euroimmun. F. Graus recibió un estipendio de licencia de Euroimmun por el uso de IgLON5 como prueba de autoanticuerpos. Visite Neurology.org para conocer la información completa.

Recibido el 4 de abril de 2017. Aceptado en forma final el 13 de julio de 2017.

## BIBLIOGRAFÍA

- Graus F, Titulaer MJ, Balu R, et al. A clinical approach to diagnosis of autoimmune encephalitis. *Lancet Neurol* 2016;15:391–404.
- Gaig C, Graus F, Compta Y, et al. Clinical manifestations of the anti-IgLON5 disease. *Neurology* 2017;88:1736–1743.
- Dalmau J, Lancaster E, Martinez-Hernandez E, Rosenfeld MR, Balice-Gordon R. Clinical experience and laboratory investigations in patients with anti-NMDAR encephalitis. *Lancet Neurol* 2011;10:63–74.
- Irani SR, Stagg CJ, Schott JM, et al. Faciobrachial dystonic seizures: the influence of immunotherapy on seizure control and prevention of cognitive impairment in a broadening phenotype. *Brain* 2013;136:3151–3162.

5. Geschwind MD, Shu H, Haman A, Sejvar JJ, Miller BL. Rapidly progressive dementia. *Ann Neurol* 2008;64:97–108.
6. Flanagan EP, Kotsenas AL, Britton JW, et al. Basal ganglia T1 hyperintensity in LGI1-autoantibody faciobrachial dystonic seizures. *Neurol Neuroimmunol Neuroinflamm* 2015;2:e161.
7. van Sonderen A, Thijs RD, Coenders EC, et al. Anti-LGI1 encephalitis: clinical syndrome and long-term follow-up. *Neurology* 2016;87:1449–1456.
8. Haitao R, Yingmai Y, Yan H, et al. Chorea and parkinsonism associated with autoantibodies to IgLON5 and responsive to immunotherapy. *J Neuroimmunol* 2016;300:9–10.
9. Tobin WO, Lennon VA, Komorowski L, et al. DPPX potassium channel antibody: frequency, clinical accompaniments, and outcomes in 20 patients. *Neurology* 2014; 83:1797–1803.
10. Grau-Rivera O, Sánchez-Valle R, Saiz A, et al. Determination of neuronal antibodies in suspected and definite Creutzfeldt-Jakob disease. *JAMA Neurol* 2014;71:74–78.
